**Title: MECHANISMS OF BLEEDING REDUCTION INDUCED BY APROTININ DURING CARDIOPULMONARY BYPASS : A CONTROLLED STUDY**

Authors: COMMIN PL MD, LU H MD, SORIA C PhD, CAEN JP MD PhD, PIWNICA A MD, ECHTER E MD.

Affiliation: Anes. Dept., Lariboisiere University Hospital, Paris, France.

Effectiveness of Aprotinin (Trasylol) on bleeding during cardiopulmonary bypass (CPB) has been well established. Mechanisms of action were investigated in a double blind study performed on 20 patients who underwent aorto coronary bypass and were randomly included in Placebo (P) or in Aprotinin (A) group.

**Patients characteristics:** age (A:  $60.4 \pm 8.1$ , P:  $62.8 \pm 4.64$  years), number of grafts (A:  $2.6 \pm .5$ , P:  $2.6 \pm .5$ ) and preoperative Left Ventricular Ejection Fraction (A:  $50 \pm 8.3$  %, P:  $48 \pm 5$  %), no aspirin during 8 days prior to the operation.

**Aprotinin Protocol:** loading dose of 280 mg prior to incision, 280 mg into the membrane oxygenator prime, and a continuous infusion of 50 mg/h from anesthesia induction until ICU arrival. Heparinemia during CPB was kept over 4 Units/ml. Blood loss from mediastinal drainage was recorded for each patient. Blood was sampled before anesthesia (1), 30 min after start of CPB (2), 5 min after aortic clamp release (3) and after heparin neutralization (4). Samples were studied to determine: 1° specific fibrin degradation products as D Dimers complex (DDE),

2° Platelet function by Ristocetin Agglutination, 3° tissue Plasminogen Activators (tPA), 4° BThromboglobulin (BTG) and platelets number.

**RESULTS:** ANOVA mean 1-4,

|                           | 1   | 2    | 3     | 4      | ANOVA |
|---------------------------|-----|------|-------|--------|-------|
| DDE (ng/ml) A             | 102 | 57   | 81    | 461    | <.001 |
| P                         | 280 | 338* | 710** | 1944** |       |
| RA A                      | 100 | 103  | 100   | 92     | <.001 |
| (%control) P              | 100 | 78*  | 61**  | 52**   |       |
| PLATELETS A               | 250 | 125  | 133   | 111    | ns    |
| (1000/mm <sup>3</sup> ) P | 276 | 122  | 143   | 135    |       |
| tPA (ng/ml) A             | 8.3 | 6.7  | 10.6  | 18.4   | ns    |
| P                         | 6.8 | 10.6 | 11.8  | 18.4   |       |
| BTG (ng/ml) A             | 117 | 117  | 180   | 290    | ns    |
| P                         | 98  | 106  | 182   | 283    |       |
| PK A                      | 100 | 73   | 69    | 73     | ns    |
| (%control) P              | 100 | 69.5 | 62    | 68.8   |       |

p<0.05 \*, p<0.005 \*\*

**NEGATIVE CORRELATIONS**

DDE2 vs RA(4) p<0.001, vs RA(3) p<0.008

| DRAINAGE VOLUME (ml) | MEAN | SEM  | WILCOXON |
|----------------------|------|------|----------|
| A                    | 277  | ±46  | p<0.04   |
| P                    | 629  | ±189 |          |

Those findings suggest that Aprotinin acts by plasmin inhibition with a resulting protective effect on platelet GPIb receptors break down on the platelet membrane. Moreover A inhibits tPA effects on the hemostatic clots of the wound closure

**REFERENCES:** Bidstrup BP et al, J Thorac. Cardiovasc. Surg., 1989, Vol197, 364.

## A1206

**TITLE: IS THE THROMBOELASTOGRAPH A CLINICALLY USEFUL PREDICTOR OF BLOOD LOSS AFTER BYPASS?**

AUTHORS: DF VAN RIPER MD, JC HORROW MD, D OSBORNE BS

AFFILIATION: Department of Anesthesiology, Hahnemann University, Philadelphia, PA 19102

The thromboelastograph (TEG) may assist recognition and management of coagulopathies after cardiopulmonary bypass (CPB).<sup>1</sup> Fig.1 displays TEG measurements: R and K reflect coagulation time;  $\alpha$  is speed of clot formation; MA is maximum clot strength;  $A_{60}$  is clot strength 60 min later; whole blood clot lysis index ( $WBCL = A_{60}/MA$ ) measures clot breakdown.  $WBCL < 0.8$  indicates fibrinolysis.<sup>2</sup> This study determined whether TEG measurements correlated with fibrin split products  $\geq 10 \mu\text{g/ml}$  (+FSP) and predicted blood loss after CPB.

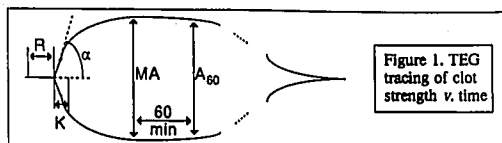

**Methods:** After institutional approval and informed consent, patients undergoing cardiac surgery donated blood prior to skin incision (FSP1, TEG1), after protamine (TEG2), and again 2 hrs after sternal closure (FSP3, TEG3). Mass of blood drained via mediastinal tubes over 12 hrs determined blood loss. Correlation coefficients compared TEG data with blood loss.  $WBCL$  cut-offs of 0.8 and 0.05 divided patients into groups. ("Tear-drop" TEG patterns occur at  $WBCL < 0.05$ .) Chi-sq statistic compared frequency data; unpaired t-test compared grouped continuous variables.

**Results:** No patient had +FSP prior to skin incision, but 16/88 had  $WBCL < 0.8$  and 1/88  $WBCL = 0$ .  $WBCL$  after protamine (TEG2) predicted blood loss (table). After operation (TEG3),  $WBCL$  correlated with neither +FSP nor blood loss (table).  $WBCL$  (fig.2), R, K, and  $\alpha$  did not correlate with blood loss; MA ( $r = .34$ ) and  $A_{60}$  ( $r = .25$ ) correlated poorly. +FSP after surgery did not affect R, K,  $\alpha$ ,  $A_{60}$ , or  $WBCL$ , and minimally affected MA ( $65 \text{ v. } 61 \text{ } P < .04$ ).

| TABLE:        | $WBCL \geq 0.8$    | $< 0.8$         | $\geq 0.05$       | $< 0.05$           |
|---------------|--------------------|-----------------|-------------------|--------------------|
| TEG2 Bld loss | $384 \pm 188$ (SD) | $525 \pm 321^*$ | $386 \pm 182$     | $808 \pm 428^{\#}$ |
| TEG3 +FSP3    | 15/70              | 8/19            | 23/88             | 0/1                |
| TEG3 Bld loss | $400 \pm 220$      | $463 \pm 221$   | $413 \pm 222$     | 412                |
|               | *N=16/86, P=0.023  |                 | #N=5/86, P=0.0001 |                    |

**Discussion:** TEG3 parameters predict neither presence of FSP nor post-op bleeding. Post-op TEG appears to provide no useful information. TEG2 did predict blood loss, confirming that fibrinolysis occurs and corrects with time. However, >1 hr is needed to measure  $WBCL$ . By this time, fibrinolysis has subsided. TEG2 information is too tardy for therapeutic decisions.

**References:**

1. SPIESS BD, ET AL.: J CLIN MONIT 3:25-30, 1987.
2. KANG YG, ET AL.: ANESTHESIOLOGY 66:766-773, 1987.

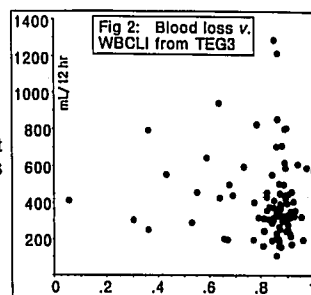

Source: https://asa2.silverchair.com/anesthesiology/article-pdf/73/3A/NA/665675/0000542-199009001-01206.pdf
